# Supplementary material
Source: MDPI journal article supplement (https://www.mdpi.com/2073-445X/13/5/599)
Supplement: s1 [file s1]

## Supplementary material

**Table S1.** Collected samples and metadata.

|        | Year | Plot | Phytosanitary<br>treatment | Soil<br>management |
|--------|------|------|----------------------------|--------------------|
| C1A17  | 2017 | 1    | IPM                        | ST                 |
| C2A17  | 2017 | 2    | IPM                        | ST                 |
| C3A17  | 2017 | 3    | IPM                        | ST                 |
| C4A17  | 2017 | 4    | IPM                        | ST                 |
| C5A17  | 2017 | 5    | IPM                        | ST                 |
| T1A20P | 2020 | 1    | IPM                        | PCC                |
| T1B20P | 2020 | 1    | IPM                        | PCC                |
| T1C20P | 2020 | 1    | IPM                        | PCC                |
| T1A20G | 2020 | 1    | IPM                        | GM                 |
| T1B20G | 2020 | 1    | IPM                        | GM                 |
| T1C20G | 2020 | 1    | IPM                        | GM                 |
| T2A20P | 2020 | 2    | IPM_50_GG                  | PCC                |
| T2B20P | 2020 | 2    | IPM_50_GG                  | PCC                |
| T2C20P | 2020 | 2    | IPM_50_GG                  | PCC                |
| T2A20G | 2020 | 2    | IPM_50_GG                  | GM                 |
| T2B20G | 2020 | 2    | IPM_50_GG                  | GM                 |
| T2C20G | 2020 | 2    | IPM_50_GG                  | GM                 |
| T3A20P | 2020 | 3    | BIO                        | PCC                |
| T3B20P | 2020 | 3    | BIO                        | PCC                |
| T3C20P | 2020 | 3    | BIO                        | PCC                |
| T3A20G | 2020 | 3    | BIO                        | GM                 |
| T3B20G | 2020 | 3    | BIO                        | GM                 |
| T3C20G | 2020 | 3    | BIO                        | GM                 |
| T4A20P | 2020 | 4    | BIO_50_GG                  | PCC                |
| T4B20P | 2020 | 4    | BIO_50_GG                  | PCC                |
| T4C20P | 2020 | 4    | BIO_50_GG                  | PCC                |
| T4A20G | 2020 | 4    | BIO_50_GG                  | GM                 |
| T4B20G | 2020 | 4    | BIO_50_GG                  | GM                 |
| T4C20G | 2020 | 4    | BIO_50_GG                  | GM                 |
| T5A20P | 2020 | 5    | GG                         | PCC                |
| T5B20P | 2020 | 5    | GG                         | PCC                |
| T5C20P | 2020 | 5    | GG                         | PCC                |
| T5A20G | 2020 | 5    | GG                         | GM                 |
| T5B20G | 2020 | 5    | GG                         | GM                 |
| T5C20G | 2020 | 5    | GG                         | GM                 |

**Table S2.** Values of the soil chemical parameters *per* sample.

|        | TN%   | TOC%  | C:N    | CaCO <sub>3</sub> % | pH  |
|--------|-------|-------|--------|---------------------|-----|
| C1A17  | 0.036 | 0.561 | 15.725 | 19.475              | 8.2 |
| C2A17  | 0.074 | 1.018 | 13.780 | 29.886              | 8.0 |
| C3A17  | 0.106 | 1.280 | 12.034 | 17.550              | 8.1 |
| C4A17  | 0.054 | 0.819 | 15.263 | 19.778              | 8.0 |
| C5A17  | 0.104 | 1.310 | 12.555 | 14.182              | 8.0 |
| T1A20P | 0.055 | 0.771 | 13.957 | 16.537              | 8.1 |
| T1B20P | 0.024 | 0.446 | 18.723 | 22.549              | 8.2 |
| T1C20P | 0.047 | 0.698 | 15.007 | 24.109              | 8.2 |
| T1A20G | 0.049 | 0.716 | 14.567 | 17.449              | 8.1 |
| T1B20G | 0.035 | 0.590 | 16.629 | 19.051              | 8.2 |
| T1C20G | 0.035 | 0.680 | 19.672 | 16.777              | 8.0 |
| T2A20P | 0.071 | 0.991 | 14.024 | 22.928              | 8.0 |
| T2B20P | 0.056 | 0.726 | 13.072 | 26.551              | 8.1 |
| T2C20P | 0.068 | 1.230 | 18.202 | 28.817              | 8.1 |
| T2A20G | 0.084 | 1.077 | 12.901 | 21.269              | 8.2 |
| T2B20G | 0.080 | 0.943 | 11.825 | 27.899              | 8.0 |
| T2C20G | 0.067 | 0.938 | 14.089 | 30.032              | 7.9 |
| T3A20P | 0.046 | 0.743 | 16.038 | 23.144              | 8.2 |
| T3B20P | 0.094 | 1.186 | 12.586 | 15.482              | 8.1 |
| T3C20P | 0.099 | 1.187 | 12.008 | 20.286              | 8.1 |
| T3A20G | 0.071 | 0.987 | 13.914 | 12.702              | 8.1 |
| T3B20G | 0.105 | 1.225 | 11.643 | 13.321              | 8.1 |
| T3C20G | 0.114 | 1.340 | 11.794 | 19.031              | 8.2 |
| T4A20P | 0.080 | 1.130 | 14.139 | 36.129              | 8.1 |
| T4B20P | 0.067 | 0.981 | 14.610 | 3.906               | 8.1 |
| T4C20P | 0.086 | 1.178 | 13.658 | 5.672               | 8.2 |
| T4A20G | 0.036 | 0.539 | 15.013 | 46.995              | 8.1 |
| T4B20G | 0.062 | 0.935 | 14.993 | 5.435               | 8.1 |
| T4C20G | 0.084 | 1.057 | 12.580 | 6.615               | 8.1 |
| T5A20P | 0.126 | 1.394 | 11.078 | 11.643              | 8.1 |
| T5B20P | 0.104 | 1.209 | 11.656 | 12.539              | 7.9 |
| T5C20P | 0.102 | 1.352 | 13.318 | 16.633              | 8.1 |
| T5A20G | 0.124 | 1.556 | 12.584 | 9.946               | 8.1 |
| T5B20G | 0.112 | 1.310 | 11.752 | 8.160               | 7.9 |
| T5C20G | 0.143 | 1.745 | 12.172 | 13.669              | 8.0 |

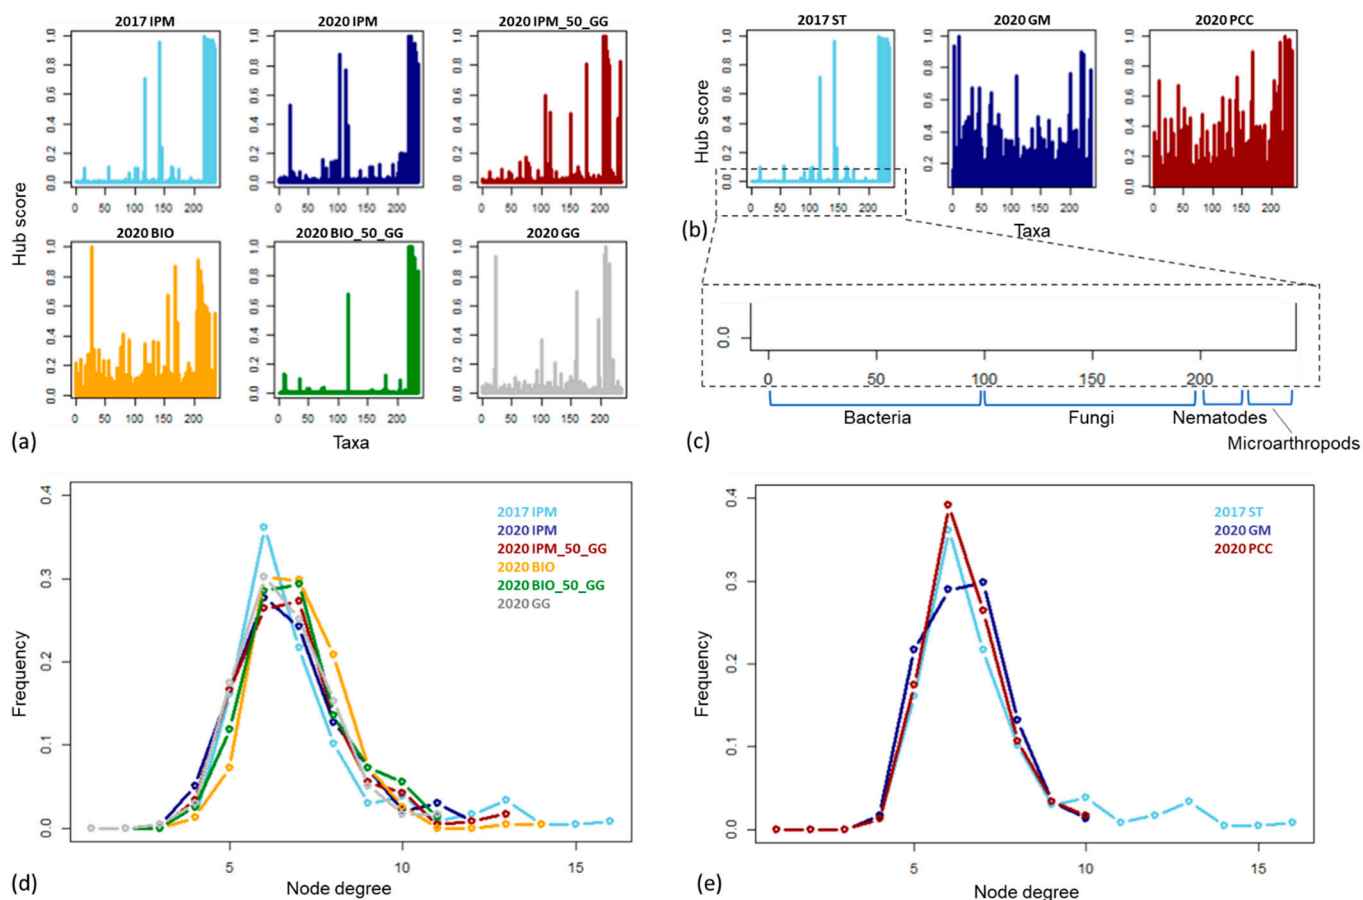

**Figure S1.** (a,b) Hub scores of each node (taxon) of the networks, obtained grouping the samples on the basis of the phytosanitary treatment (a) or the soil management (b). (c) Zoom of the x axis of the hub scores plots, and annotation of the nodes to the corresponding trophic level. (d,e) Node degree distributions of the treatment (d) and management (e) networks.
